# Supplementary material for: Copper selective self-sorting polymeric resin with mixed-mode functionality for column preconcentration and atomic absorption spectrometric determination
Source: Royal Society of Chemistry journal article supplement (doi:10.1039/c5ra18542d), 2016-01-01
Supplement: c5ra18542d1.pdf [file c5ra18542d1.pdf]

**Supplementary Material**

**Copper selective self-sort polymeric resin with mixed-mode functionality for column preconcentration and atomic absorption spectrometric determination**

**Aminul Islam\*, Hilal Ahmad, Noushi Zaidi, Suneel Kumar**

Analytical Research Laboratory, Department of Chemistry, Aligarh Muslim University, Aligarh,  
India-202 002

Journal: RSC Advances

This Electronic Supplementary Information (ESI) file includes the supplementary figures and table.

---

\*Corresponding author: Analytical Research Laboratory, Department of Chemistry, Aligarh Muslim University, Aligarh, India -202 002 Tel.: +91 9358979659; E-mail address: [aminulislam.ch@amu.ac.in](mailto:aminulislam.ch@amu.ac.in)

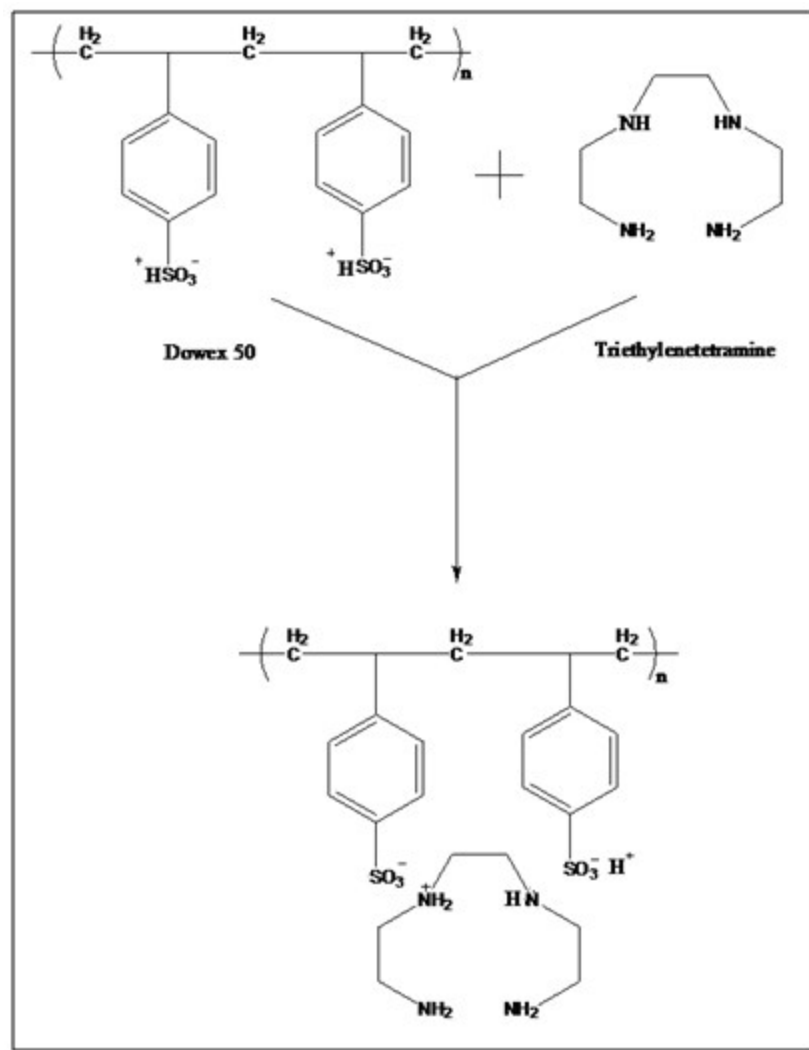

ESI Figure S1. Scheme for the preparation of Dow-trien chelating resin.

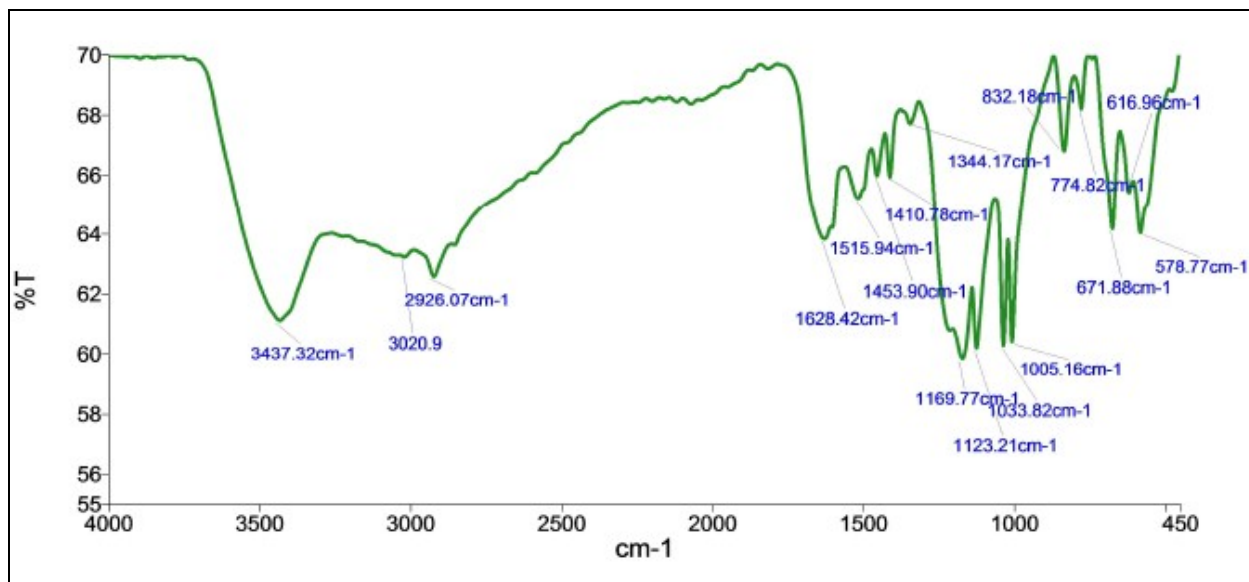

ESI Figure S2. FTIR spectra of Dow-trien resin.

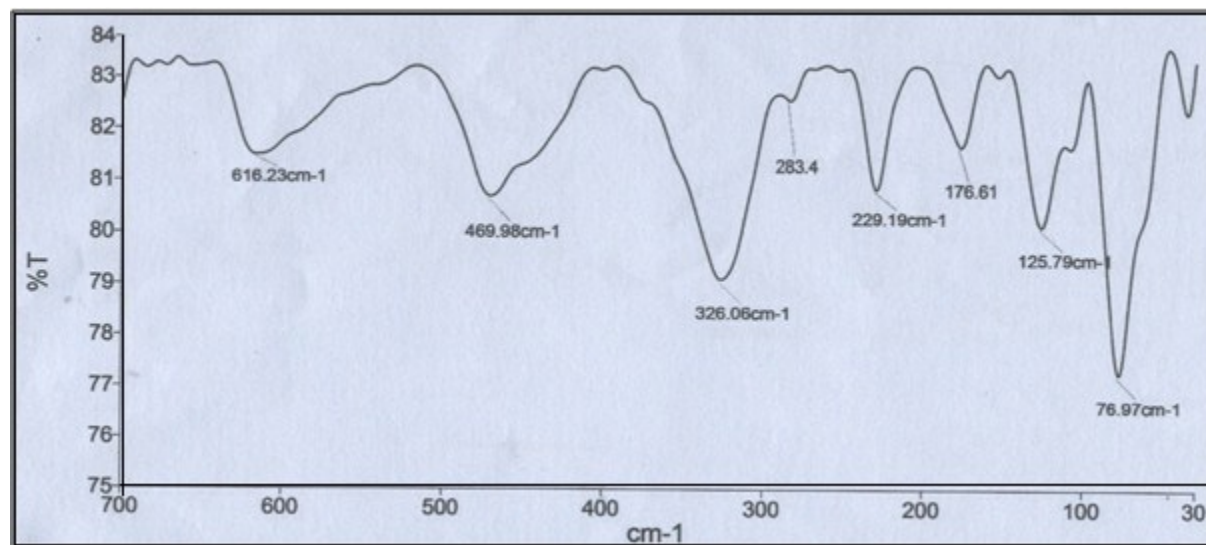

ESI Figure S3. Far IR spectra of the Cu(II) complexed Dow-trien.

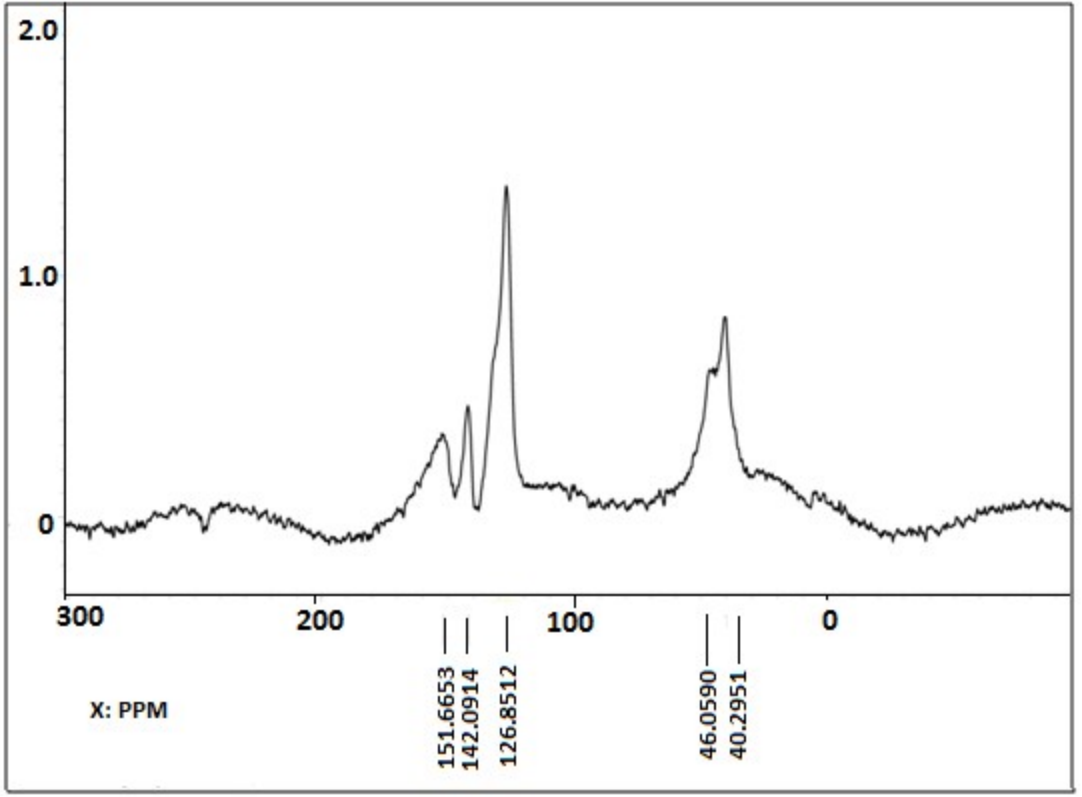

ESI Figure S4.  $^{13}\text{C}\{^1\text{H}\}$  CP/MAS NMR spectra of Dow-trien resin.

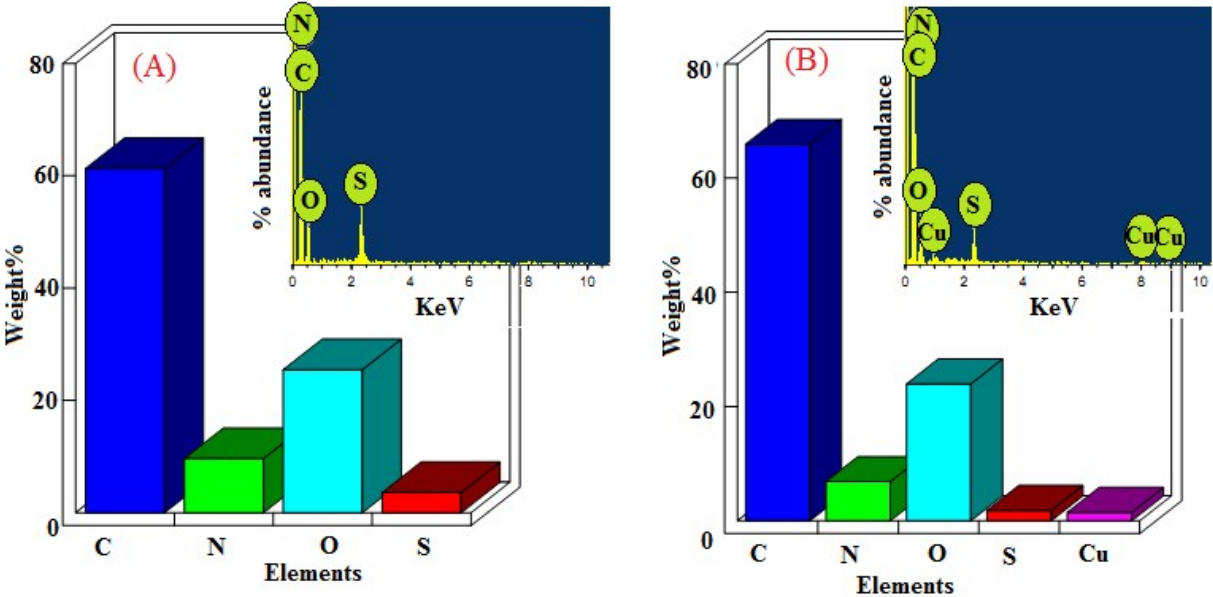

ESI Figure S5A and S5B. EDS analysis of Dowex and Dow-trien resins.

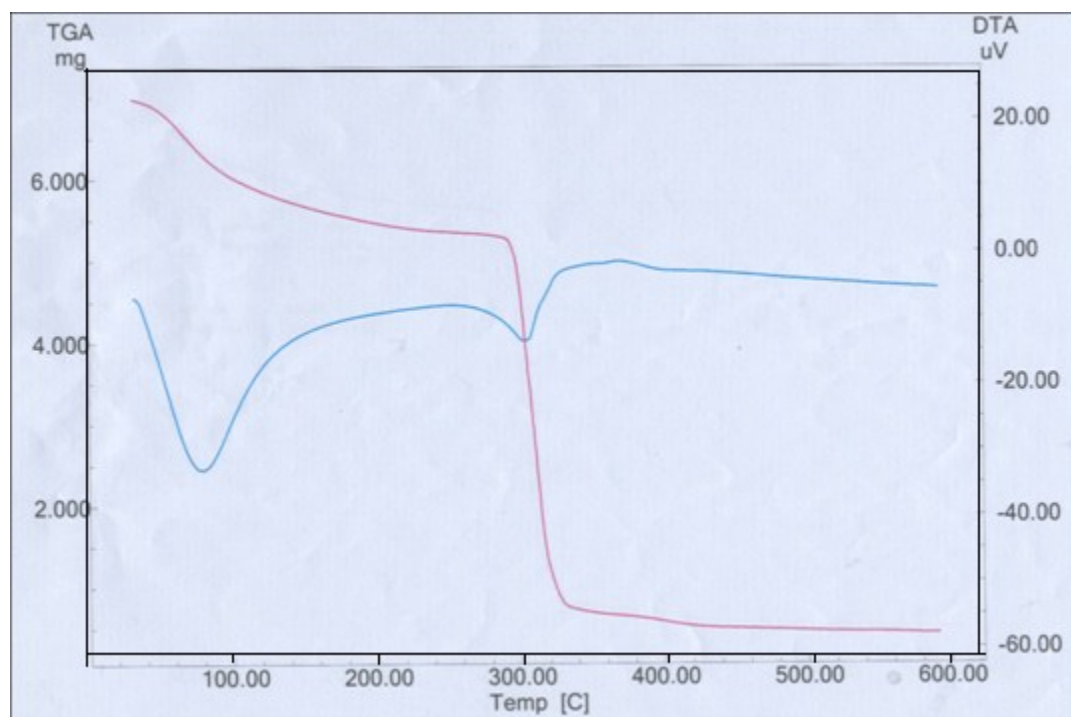

**ESI Figure S6.** TGA/DTA spectra depicts the thermal stability of Dow-trien.

**ESI Table S1**

Elemental analysis data of Dowex and Dow-trien resins.

| Resin     | Element content (%) |      |      |      |      |         |
|-----------|---------------------|------|------|------|------|---------|
|           | C                   | H    | N    | S    | O    | $L_0^a$ |
| Dowex     | 39.45               | 4.65 | 0.01 | 2.93 | 42.9 | -       |
| Dow-trien | 42.69               | 5.21 | 2.43 | 2.96 | 33.7 | 1.73    |

<sup>a</sup> Functionalization degree ( $L_0$ = millimoles of ligand per gram of resin).
